# Supplementary material for: Early Switch From Intravenous to Oral Antibiotics in Skin and Soft Tissue Infections: An Algorithm-Based Prospective Multicenter Pilot Trial
Source: PubMed Central journal article supplement — Open Forum Infect Dis. 2022 Apr 12;9(7):ofac197. doi: 10.1093/ofid/ofac197 (PMC9251671; doi:10.1093/ofid/ofac197), 2022-04-12
Supplement: ofac197_supplementary_data.pdf [file ofac197_supplementary_data.pdf]

## Supplementary Material

### Early Switch from Intravenous to Oral Antibiotics in Skin- and Soft-tissue Infections: An Algorithm-based Prospective Multicentre Pilot Trial.

Sandra Dellsperger,<sup>1</sup> Simea Kramer,<sup>2</sup> Michael Stoller,<sup>2</sup> Annika Burger,<sup>1</sup> Elio Geissbühler,<sup>1</sup> Isabel Amsler,<sup>1</sup> Anna Hirsig,<sup>1</sup> Linda Weyer,<sup>1</sup> Ursula Hebeisen,<sup>2</sup> Philipp Aebi,<sup>1</sup> Nicolas Burgherr,<sup>1</sup> Fabienne Brügger,<sup>2</sup> Edouard Chaix,<sup>3</sup> Jérôme Salamoni,<sup>3</sup> Sandra Glauser,<sup>1</sup> Annina Elisabeth Büchi,<sup>4,5</sup> Charles Béguelin,<sup>3</sup> Gabriel Waldegg,<sup>2</sup> Bernhard Kessler,<sup>2</sup> Martin, Egger,<sup>1</sup> Parham Sendi<sup>6</sup>

<sup>1</sup>Clinic of Internal Medicine, Emmental Hospital, Langnau, Switzerland

<sup>2</sup>Clinic of Internal Medicine, Emmental Hospital, Burgdorf, Switzerland

<sup>3</sup>Department of Internal Medicine, Spitalzentrum Biel, Biel/Bienne, Switzerland

<sup>4</sup>Department of General Internal Medicine, Inselspital, Bern University Hospital, University of Bern, Bern, Switzerland

<sup>5</sup>Department of Emergency Medicine, Inselspital, Bern University Hospital, University of Bern, Bern, Switzerland,

<sup>6</sup>Institut for Infectious Diseases, University of Bern, Bern, Switzerland.

| <b>CONTENT</b>                            | <b>Page</b> |
|-------------------------------------------|-------------|
| FIGURE S1: Study flow chart               | 2           |
| FIGURE S2: Switch criteria                | 3           |
| FIGURE S3: Questionnaire for follow up    | 4-6         |
| FIGRUE S4: Pain VAS score and explanation | 7           |

**Figure S1** Study flow chart; IV: intravenous, SSTI: skin and soft tissue infection; AB: antibiotics

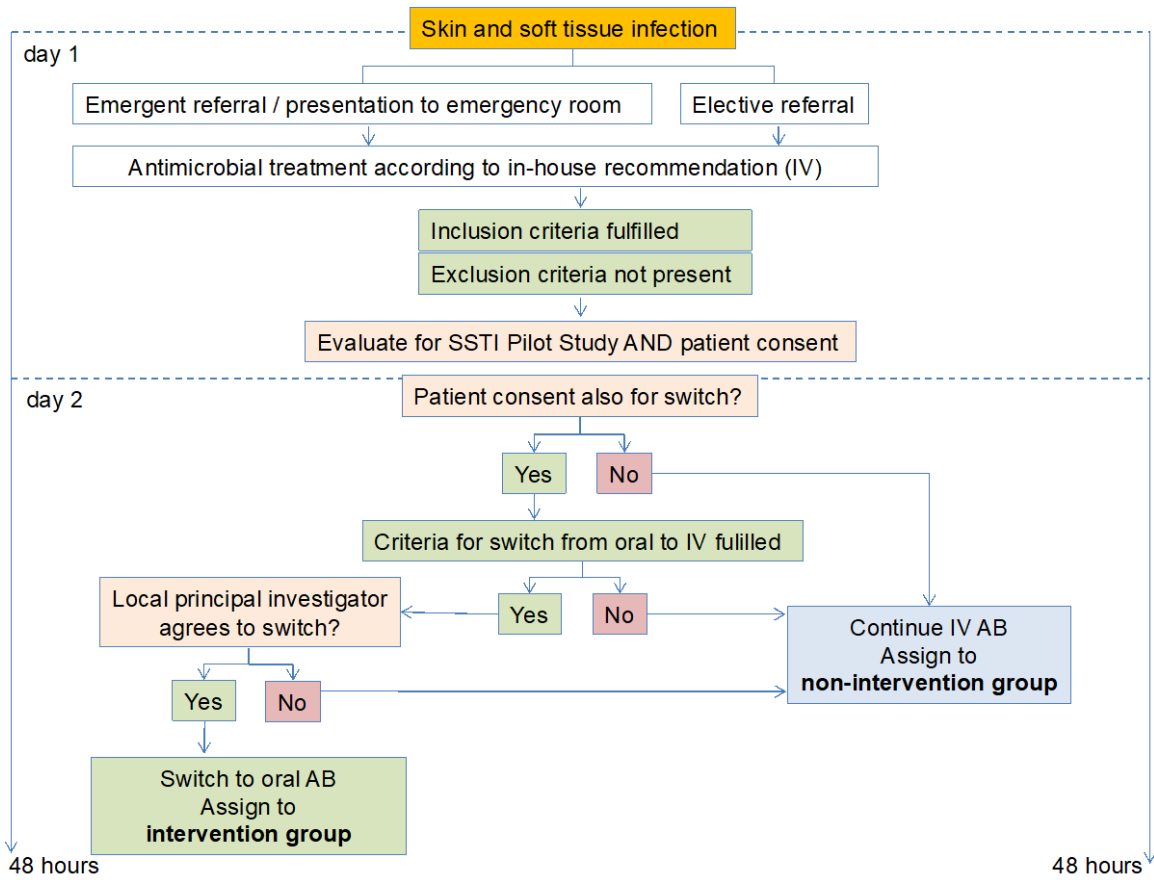

Figure S2 predefined switch criteria; PO: per os; IV: intravenous.

**EVALUATION / CHECKLIST FOR SWITCH FROM IV TO PO**

Date: \_\_\_\_\_

Date: \_\_\_\_\_

Responsible physician \_\_\_\_\_ Member of the study team \_\_\_\_\_

Siganture \_\_\_\_\_ Signature \_\_\_\_\_

| <b>INCLUSION CRITERIA</b>                                                                                                                                                                                                                                                                                                                         | <b>Yes</b>               | <b>No</b>                |
|---------------------------------------------------------------------------------------------------------------------------------------------------------------------------------------------------------------------------------------------------------------------------------------------------------------------------------------------------|--------------------------|--------------------------|
| Clinical response to antibiotic IV therapy (if one criterion or several criteria fulfilled, indicate "yes") <ul style="list-style-type: none"> <li>- General state improved</li> <li>- Pain reduced</li> <li>- Erythema smaller</li> <li>- Normalisation of PEDIS 4 Score</li> <li>- Decrease or lack of increase of laboratory values</li> </ul> | <input type="checkbox"/> | <input type="checkbox"/> |
| Temperature $\leq 37.8^{\circ}\text{C}$ for at least 24 hours                                                                                                                                                                                                                                                                                     | <input type="checkbox"/> | <input type="checkbox"/> |
| Enteral absorption is likely or proven                                                                                                                                                                                                                                                                                                            | <input type="checkbox"/> | <input type="checkbox"/> |
| Is able to eat or drink                                                                                                                                                                                                                                                                                                                           | <input type="checkbox"/> | <input type="checkbox"/> |
| <b>EXCLUSION CRITERIA (CONTINUE IV THERAPY)</b>                                                                                                                                                                                                                                                                                                   | <b>Yes</b>               | <b>No</b>                |
| Patient refuses o participate                                                                                                                                                                                                                                                                                                                     | <input type="checkbox"/> | <input type="checkbox"/> |
| PI overrules switch to oral antibiotics                                                                                                                                                                                                                                                                                                           | <input type="checkbox"/> | <input type="checkbox"/> |
| One or more of the following criteria: <ul style="list-style-type: none"> <li>• No clinical response (see above)</li> <li>• Persisting fever (<math>\geq 38^{\circ}\text{C}</math>)</li> <li>• Hypotonia, Tachycardia due to infection.</li> </ul>                                                                                                | <input type="checkbox"/> | <input type="checkbox"/> |
|  <b>In case of "X" in a grey field, antibiotic therapy must not switch to oral formulation.</b>                                                                                                                                                                |                          |                          |

| <b>Final decision</b>   | <b>Yes</b>               | <b>No</b>                |
|-------------------------|--------------------------|--------------------------|
| Inclusion SE-SSTI Study | <input type="checkbox"/> | <input type="checkbox"/> |
| Data obtained           | <input type="checkbox"/> | <input type="checkbox"/> |
| Switch to oral arm      | <input type="checkbox"/> | <input type="checkbox"/> |

## Figure S3 predefined questionnaire for follow up on day 30

Confidential

884\_SE-SSTI  
Page 1

### Tag 30 clinical response (engl.)

Record ID

Interviewer

Date of the clinical response

(Date)

Is the patient still hospitalized?

- Yes  
 No

Prolonged hospitalisation because of a relapse of a skin or soft tissue infection (SSTI)?

- Yes  
 No

Reason of the prolonged hospitalisation, if there is no SSTI

Re-hospitalisation after discharge?

- Yes  
 No  
(Also in an other hospital)

Number of days of the renewed hospitalisation

Time interval (in days) between diagnosis of the SSTI and the phone interview

Renewed antibiotic treatment after discharge?

- Yes  
 No

Which antibiotic agent?

(Name of the medication)

Number of doses

Date of the restart of the antibiotic treatment?

\_\_\_\_\_

When was the antibiotic treatment stopped?

\_\_\_\_\_

Was there a renewed doctor visit after discharge?

- Yes
- No

When was the doctor visit?

\_\_\_\_\_

Where was the follow-up appointment?

\_\_\_\_\_  
(Family physician, Hospital, please organize the finding)

General state of health?

- better than at discharge
- as good as at discharge
- worse than at discharge

Decrease of the redness?

- Yes
  - No
- (Subjectiv, from the patients's standpoint, area and colour intensity)

Blood pressure (in the morning at rest, in mmHg)

\_\_\_\_\_  
(If the patient made a home blood pressure measurement)

Pulse

\_\_\_\_\_  
(If the patient measure on his own)

Temperature

\_\_\_\_\_  
(If the patient measure on his own)

Assessment of pain on the VAS-Scale

\_\_\_\_\_

Decrease of pain?

- No
  - Yes
  - Unchanged
- (To to enquire about the VAS-Scale)

Pathogen detection in blood cultures?

- Group A streptococci (GAS)
- Group C/G streptococci (GCS/GGS)
- Group B streptococci (GBS)
- Staphylococcus aureus
- Other organisms
- No organism identified

Microorgansim?

\_\_\_\_\_

---

Microorganisms from a local sample?

- Group A streptococci (GAS)
- Group C/G streptococci (GCS/GGS)
- Group B streptococci (GBS)
- Staphylococcus aureus
- Other
- No pathogen

---

Other species?

---

## PAIN and Figure S4

On hospital admission, the mean reported visual analogue scale score was 3 when participants moved the body site/extremity, and 2 when they rested the body site/extremity. During the course of hospitalization, these values improved to 1 and 0, respectively, in most patients belonging to the intervention group. In the non-intervention group, higher values were reported (Figure S2).

On hospital admission, the mean reported visual analogue scale score was 3 when participants moved the body site/extremity, and 2 when they rested the body site/extremity. During the course of hospitalization, these values improved to 1 and 0, respectively, in most patients belonging to the intervention group. In the non-intervention group, higher values were reported (Figure S2).

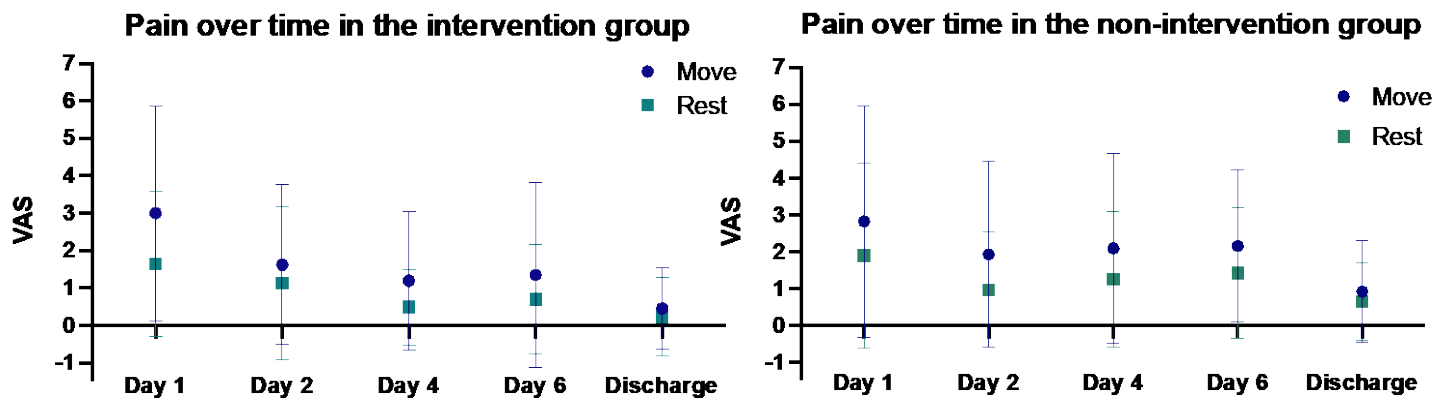

Figure S4: Mean and SD of pain measured on visual analogue scale (VAS) (0: no pain, 10: maximal pain)
